# Supplementary material for: Metabolomic, transcriptomic and genetic integrative analysis reveals important roles of adenosine diphosphate in haemostasis and platelet activation in non‐small‐cell lung cancer
Source: PubMed Central journal article supplement (PMC6822241; doi:10.1002/1878-0261.12568), 2019-09-30
Supplement: MOL2-13-2406-s001.pdf [file MOL2-13-2406-s001.pdf]

## Supplementary materials

Metabolomics, transcriptomic and genetic - integrative analysis reveals important roles of adenosine diphosphate in haemostasis and platelet activation in non-small cell lung cancer

Supplementary Table 1: Reactome Pathway Analysis of the Turquoise Module

| Pathway name                                                                      | Entities  |       |          |          | Reactions |          |
|-----------------------------------------------------------------------------------|-----------|-------|----------|----------|-----------|----------|
|                                                                                   | found     | ratio | p-value  | FDR*     | found     | ratio    |
| G2/M Checkpoints                                                                  | 88 / 154  | 0.011 | 1.11e-16 | 2.72e-14 | 24 / 24   | 0.002    |
| Mitotic G1-G1/S phases                                                            | 96 / 173  | 0.012 | 1.11e-16 | 2.72e-14 | 95 / 98   | 0.008    |
| Cell Cycle, Mitotic                                                               | 255 / 570 | 0.041 | 1.11e-16 | 2.72e-14 | 309 / 322 | 0.027    |
| G1/S Transition                                                                   | 86 / 150  | 0.011 | 1.11e-16 | 2.72e-14 | 58 / 61   | 0.005    |
| M Phase                                                                           | 158 / 390 | 0.028 | 1.11e-16 | 2.72e-14 | 62 / 66   | 0.006    |
| Cell Cycle                                                                        | 294 / 682 | 0.049 | 1.11e-16 | 2.72e-14 | 379 / 411 | 0.035    |
| Cell Cycle Checkpoints                                                            | 151 / 279 | 0.02  | 1.11e-16 | 2.72e-14 | 40 / 57   | 0.005    |
| DNA Replication                                                                   | 75 / 141  | 0.01  | 5.30e-14 | 1.05e-11 | 46 / 47   | 0.004    |
| Separation of Sister Chromatids                                                   | 92 / 194  | 0.014 | 5.53e-14 | 1.05e-11 | 8 / 8     | 6.79e-04 |
| Mitotic Metaphase and Anaphase                                                    | 97 / 211  | 0.015 | 6.93e-14 | 1.16e-11 | 12 / 12   | 0.001    |
| Mitotic Anaphase                                                                  | 96 / 208  | 0.015 | 7.45e-14 | 1.16e-11 | 11 / 11   | 9.33e-04 |
| Amplification of signal from unattached kinetochores via a MAD2 inhibitory signal | 57 / 94   | 0.007 | 3.63e-13 | 4.80e-11 | 4 / 4     | 3.39e-04 |
| Amplification of signal from the kinetochores                                     | 57 / 94   | 0.007 | 3.63e-13 | 4.80e-11 | 4 / 4     | 3.39e-04 |
| DNA Replication Pre-Initiation                                                    | 54 / 88   | 0.006 | 9.58e-13 | 1.17e-10 | 20 / 21   | 0.002    |
| Synthesis of DNA                                                                  | 68 / 132  | 0.009 | 3.15e-12 | 3.37e-10 | 26 / 26   | 0.002    |
| Mitotic Spindle Checkpoint                                                        | 60 / 110  | 0.008 | 6.33e-12 | 6.39e-10 | 7 / 7     | 5.94e-04 |
| S Phase                                                                           | 81 / 179  | 0.013 | 1.66e-11 | 1.57e-09 | 49 / 54   | 0.005    |
| Chromosome Maintenance                                                            | 57 / 105  | 0.008 | 2.51e-11 | 2.26e-09 | 27 / 27   | 0.002    |
| Homology Directed Repair                                                          | 63 / 130  | 0.009 | 2.13e-10 | 1.81e-08 | 48 / 50   | 0.004    |
| Assembly of the pre-replicative complex                                           | 42 / 68   | 0.005 | 2.49e-10 | 2.02e-08 | 11 / 12   | 0.001    |
| Resolution of Sister Chromatid Cohesion                                           | 64 / 134  | 0.01  | 2.72e-10 | 2.12e-08 | 8 / 8     | 6.79e-04 |
| Nucleosome assembly                                                               | 36 / 54   | 0.004 | 6.48e-10 | 4.60e-08 | 4 / 4     | 3.39e-04 |
| Deposition of new CENPA-containing nucleosomes at the centromere                  | 36 / 54   | 0.004 | 6.48e-10 | 4.60e-08 | 4 / 4     | 3.39e-04 |
| Mitotic Prometaphase                                                              | 84 / 207  | 0.015 | 1.18e-09 | 8.02e-08 | 15 / 15   | 0.001    |
| G1/S-Specific Transcription                                                       | 31 / 43   | 0.003 | 1.63e-09 | 1.03e-07 | 28 / 28   | 0.002    |

\* False Discovery Rate

Supplementary Table 2: Genes contained in the Agilent Gene Panel for targeted capture sequencing. The gene panel consists of 12129 probes with a total size of 266.937 kbp.

|               |               |               |                |
|---------------|---------------|---------------|----------------|
| <i>AKT1</i>   | <i>EP300</i>  | <i>MTAP</i>   | <i>RIT1</i>    |
| <i>ALK</i>    | <i>ERBB2</i>  | <i>MYC</i>    | <i>ROBO1</i>   |
| <i>ARID1A</i> | <i>ERBB4</i>  | <i>MYCL</i>   | <i>ROS1</i>    |
| <i>ARID1B</i> | <i>FBBXW7</i> | <i>NF1</i>    | <i>SETD2</i>   |
| <i>ARID2</i>  | <i>FGFR3</i>  | <i>NFE2L2</i> | <i>SF3B1</i>   |
| <i>BRAF</i>   | <i>FHIT</i>   | <i>NOTCH1</i> | <i>SMARCA4</i> |
| <i>CCND1</i>  | <i>FOXP1</i>  | <i>NRAS</i>   | <i>SOX2</i>    |
| <i>CCND3</i>  | <i>HRAS</i>   | <i>NTRK1</i>  | <i>STK11</i>   |
| <i>CDK4</i>   | <i>KEAP1</i>  | <i>PIK3CA</i> | <i>TERT</i>    |
| <i>CDKN2A</i> | <i>KRAS</i>   | <i>PTEN</i>   | <i>TP53</i>    |
| <i>CREBBP</i> | <i>MAP2K1</i> | <i>RB1</i>    | <i>TSC1</i>    |
| <i>CUL3</i>   | <i>MDM2</i>   | <i>RBM10</i>  | <i>TSC2</i>    |
| <i>EGFR</i>   | <i>MET</i>    | <i>RET</i>    | <i>U2AF1</i>   |

# Supplementary Figure 1

A

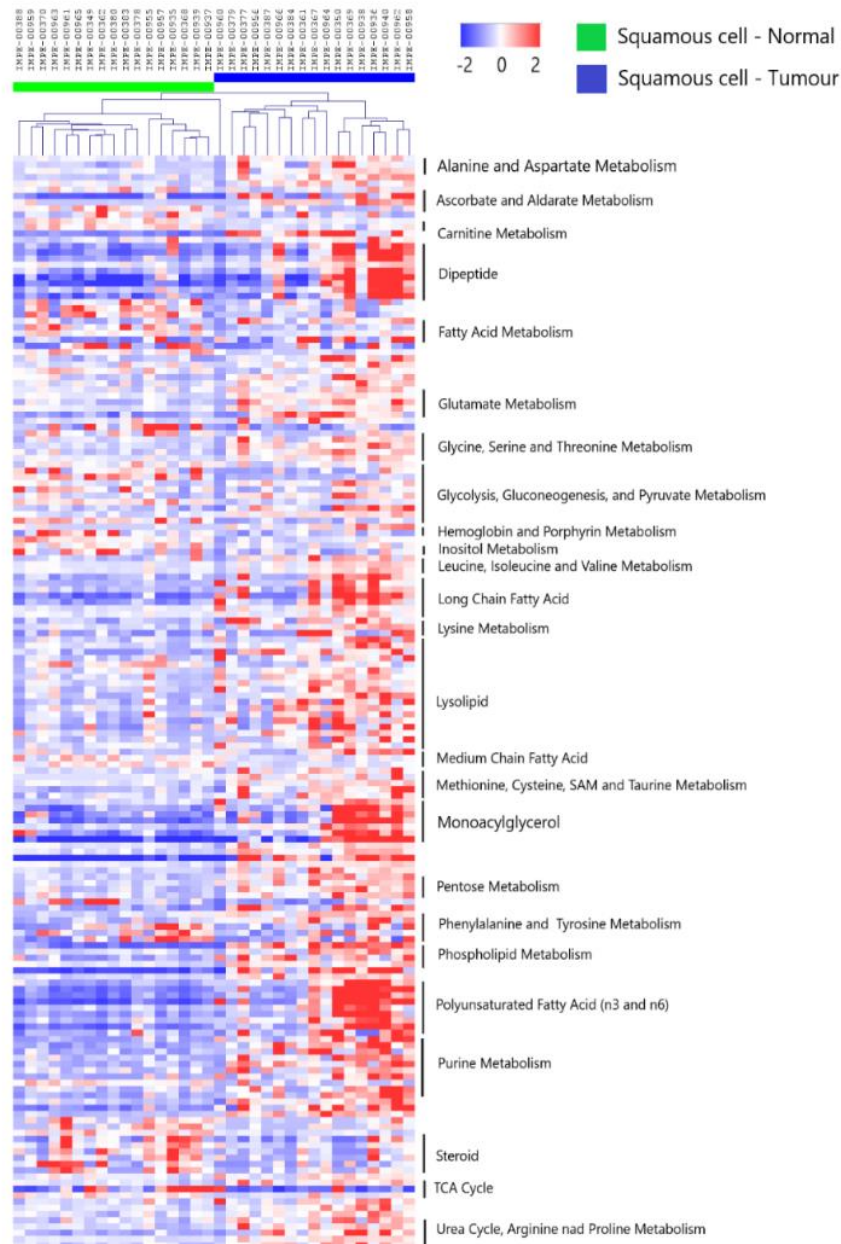

B

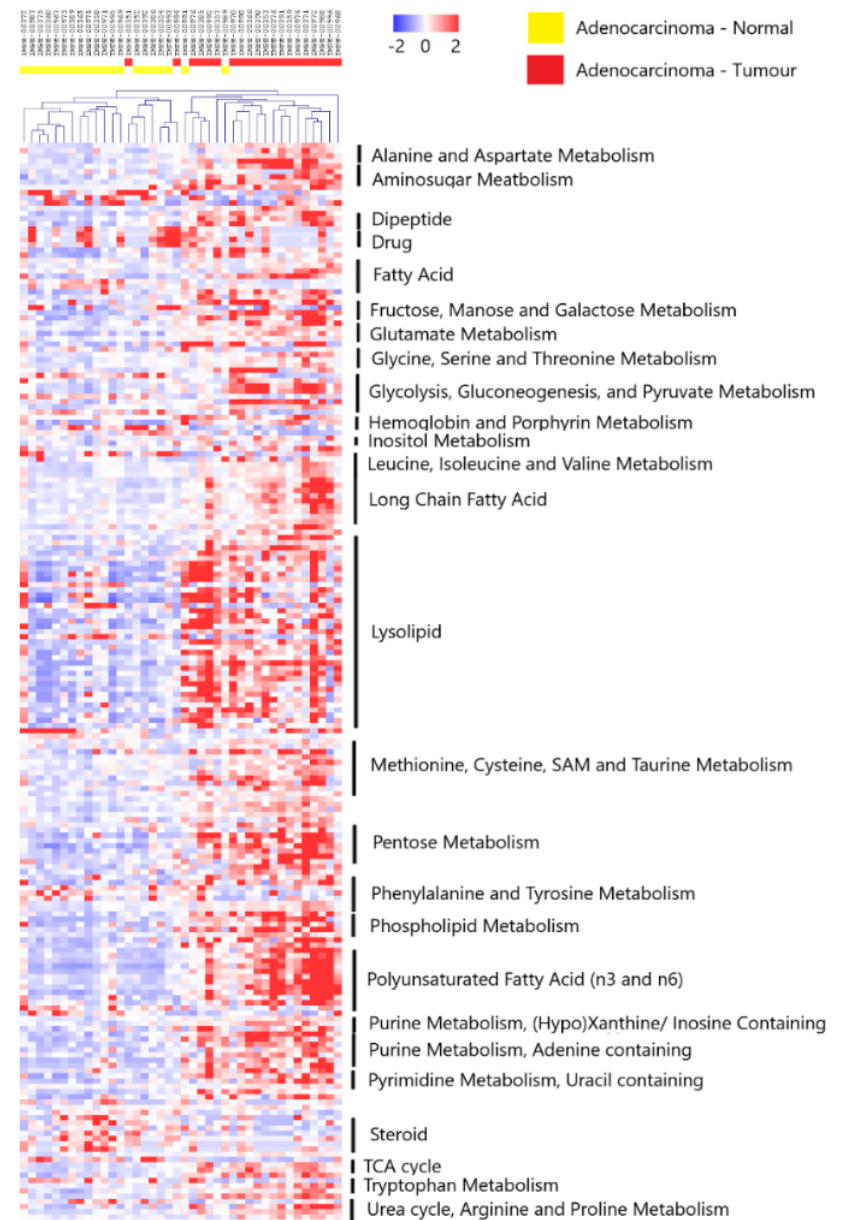

Supplementary Figure 2

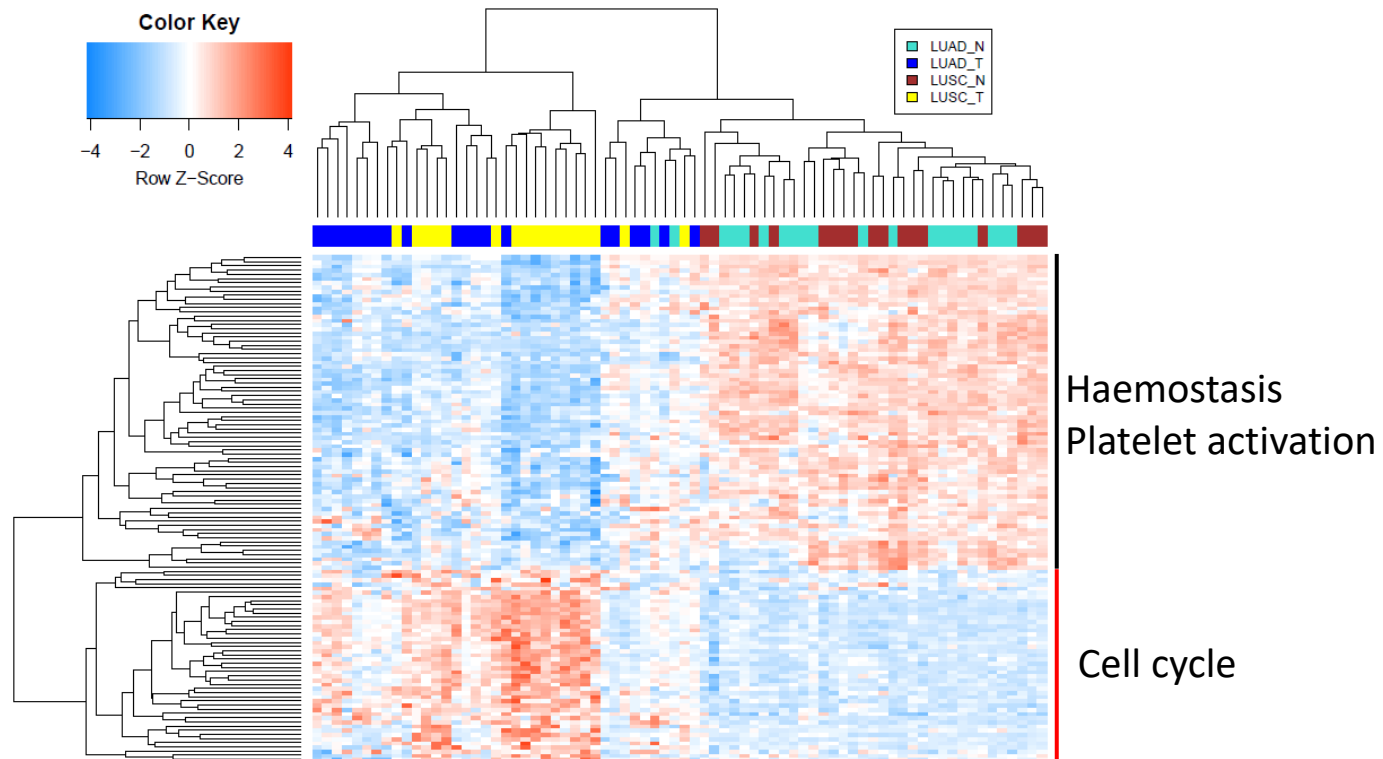

Supplementary Figure 3

LUSC

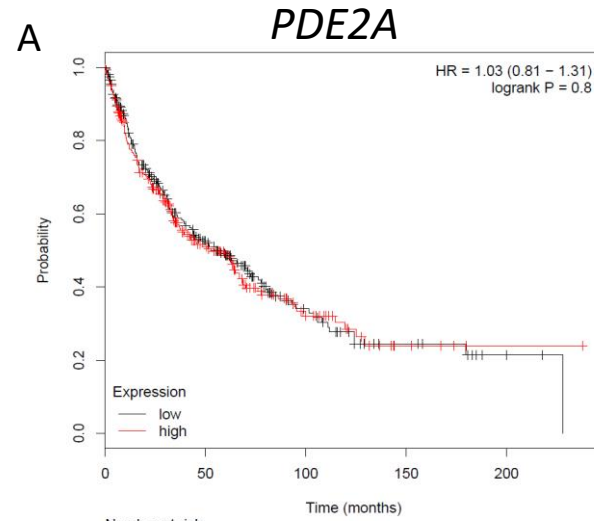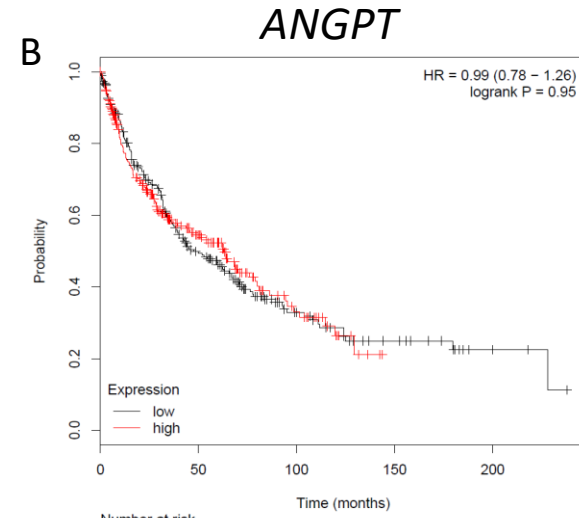

LUAD

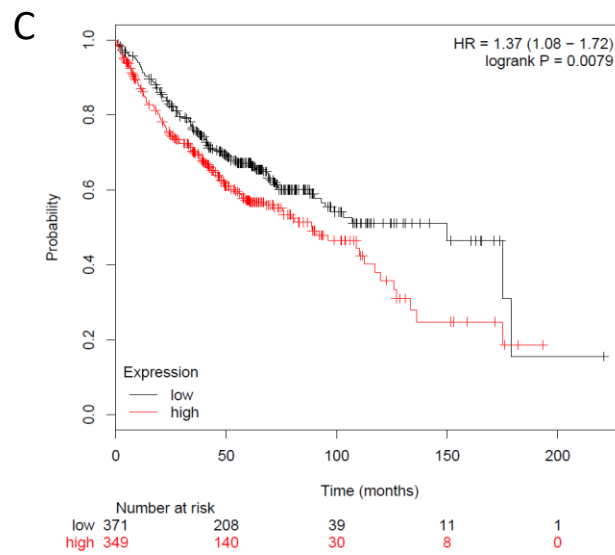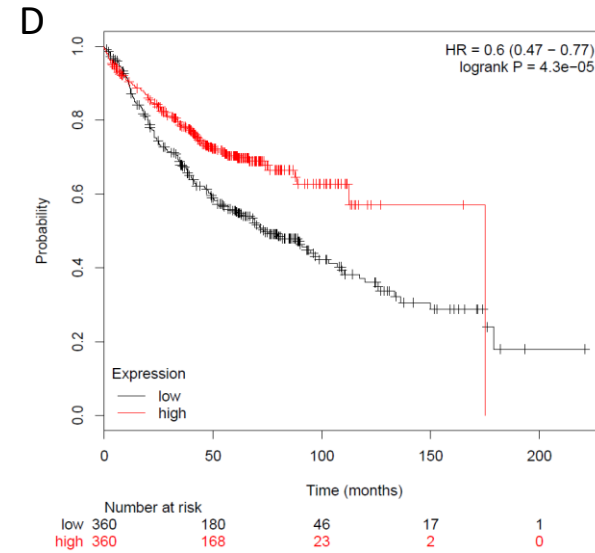

**Supplementary Figure 1:** Hierarchical clustering analysis of significant metabolites between tumour and matched normal control of LUSC (A) and LUAD (B). Metabolites with a higher level of expression in the tumours are shown in red or whilst those with a lower level of expression are indicated in blue.

**Supplementary Figure 2: Hierarchical clustering analysis of transcripts that formed the metabolites – transcripts network in Figure 3A.** Transcripts contributing to haemostasis and platelet activation were less abundant in both LUSC and LUAD tumours while those involving in cell cycle were more abundant. Transcripts with higher level in the tumours are shown in red or lower level in blue. LUAD-N: Normal tissue LUAD, LUAD-T: Tumour LUAD, LUSC-N: normal tissue LUSC, LUSC-T: Tumour LUSC

**Supplementary Figure 3: Survival analysis ([www.kmplot.com](http://www.kmplot.com)) using published expression data of *PED2A* and *ANGPT1* in lung cancer patients.** The expression level of *PED2A* and *ANGPT1* was not associated with survival outcome in patients with LUSC (A and B). In contrast, in LUAD, high expression level of *PDE2A* was associated with poorer survival (C) while high expression of *ANGPT1* was associated with better survival outcome (D).
